# Supplementary material
Source: PubMed Central journal article supplement (PMC3613182)
Supplement: supp_126.2.605_JCS115980.pdf [file supp_126.2.605_JCS115980.pdf]

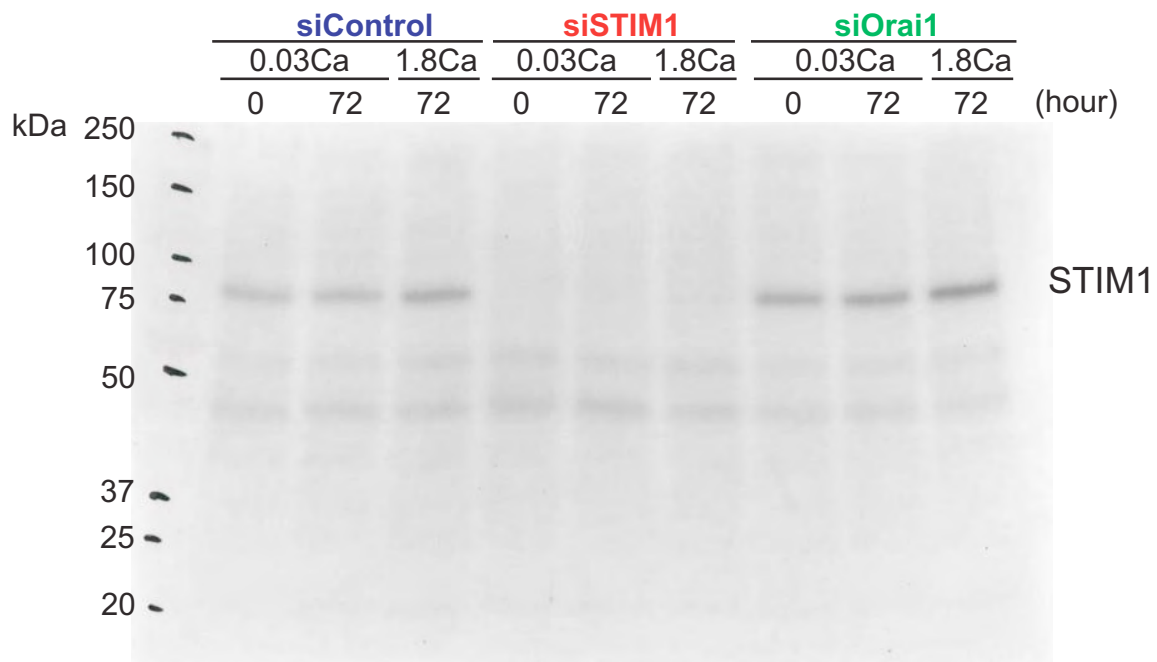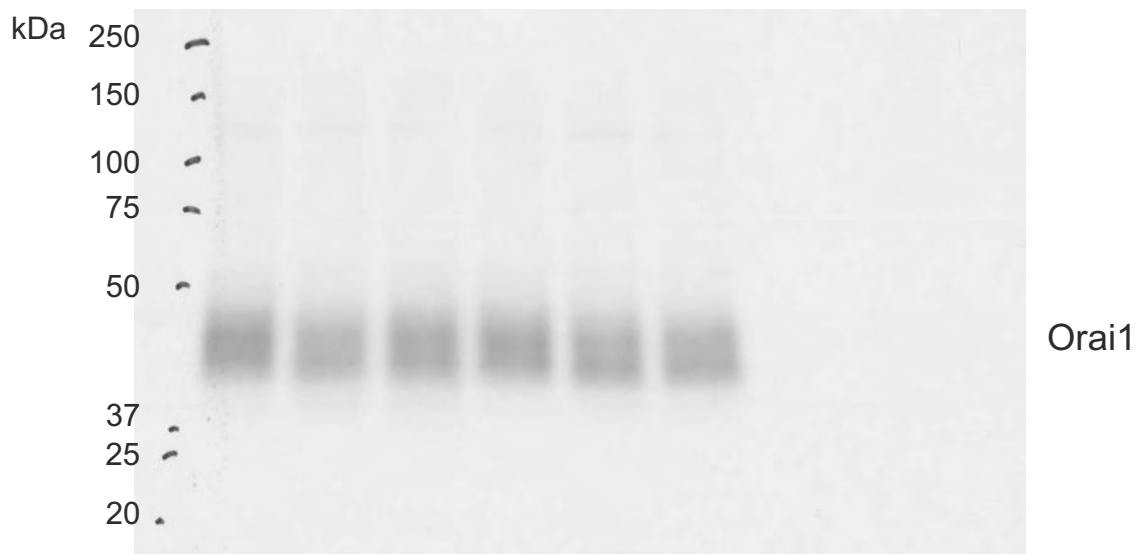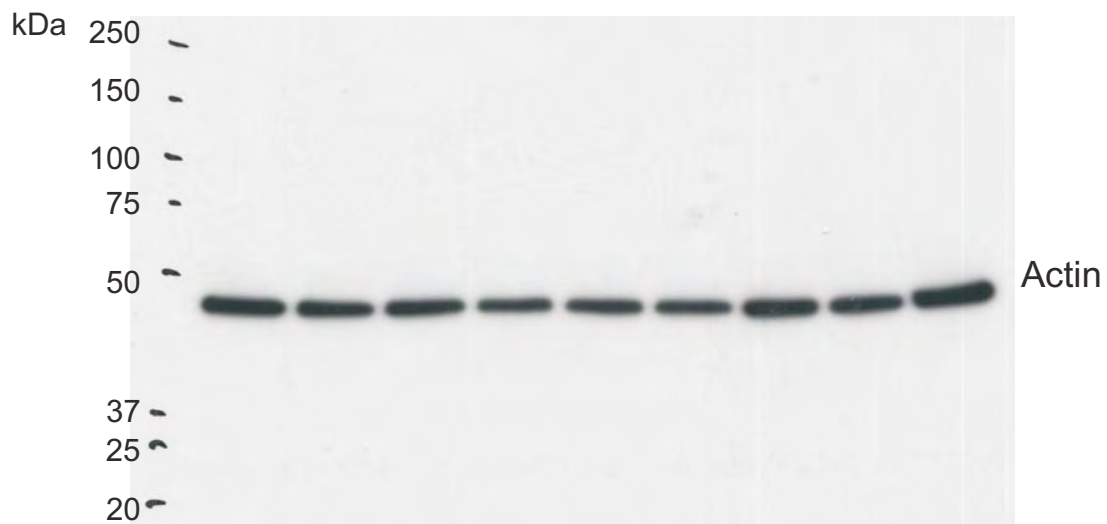

**Fig. S1. Uncropped images of western blotting showing STIM1 and Orai1 protein expression in siRNA-transfected HaCaT cells before and after Ca<sup>2+</sup> switch used in Fig. 1A.**

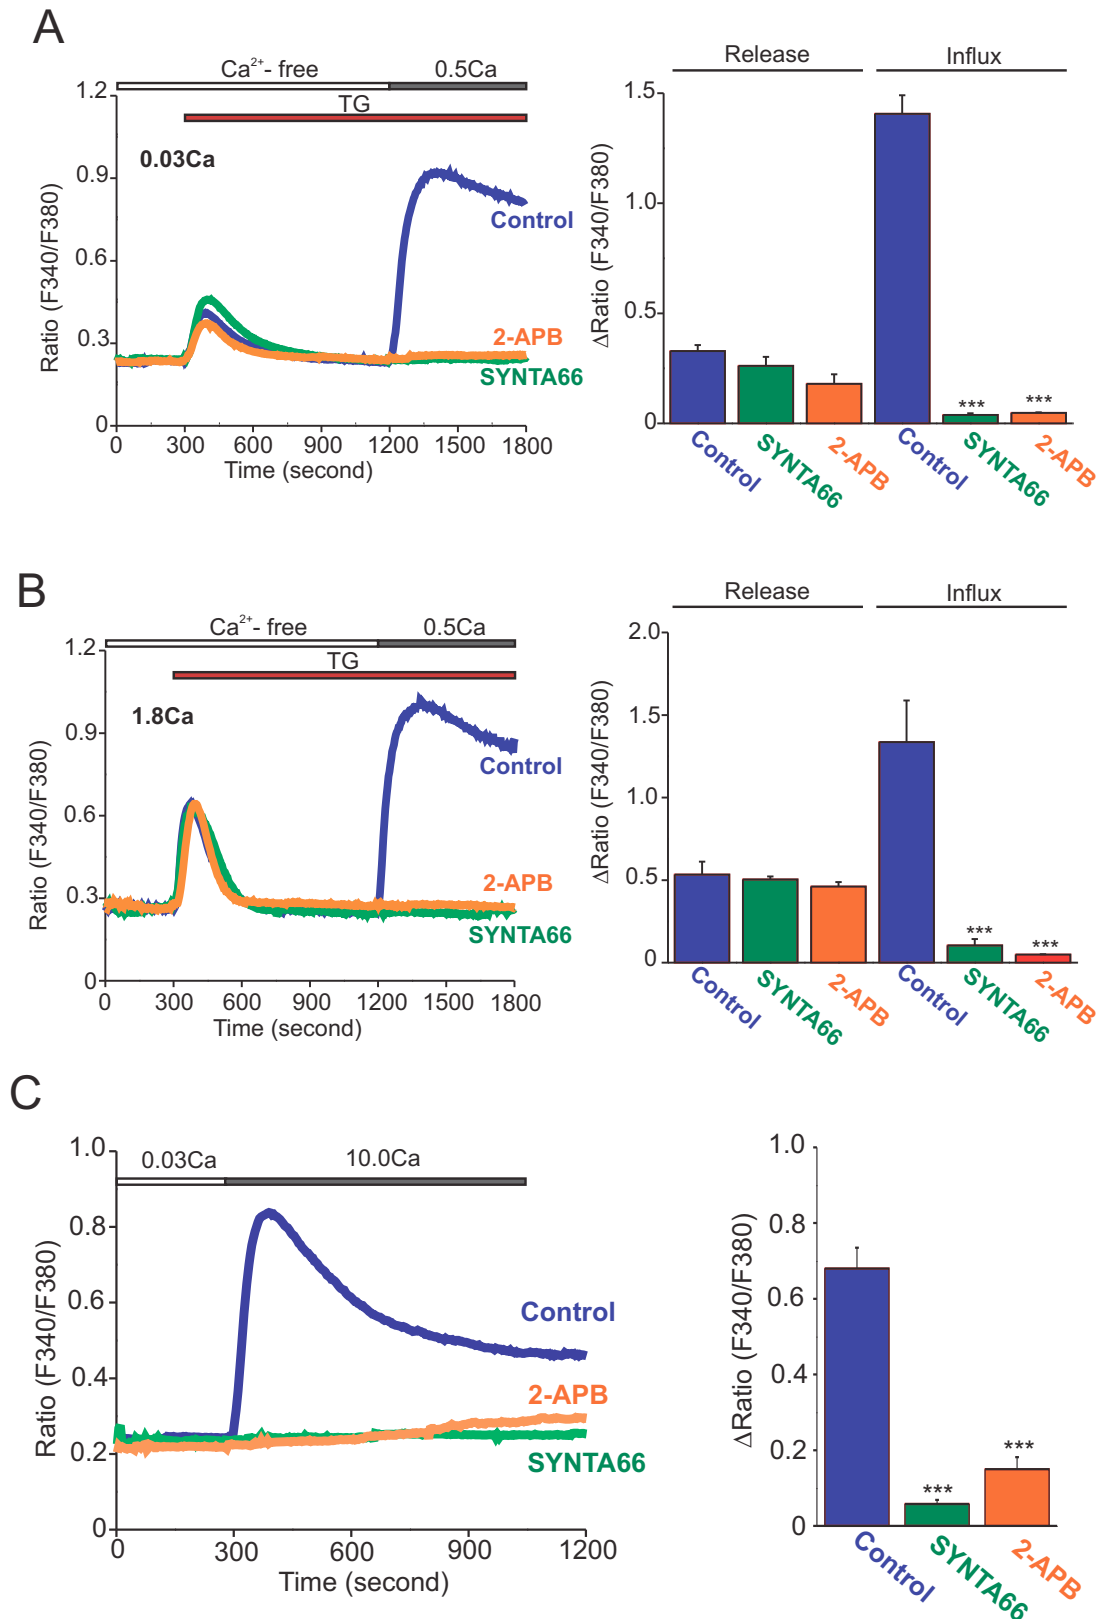

**Fig. S2. TG-induced SOCE and Ca<sup>2+</sup>-switch-induced Ca<sup>2+</sup> responses are strongly inhibited by Orai-specific SOCE inhibitors.** (A,B) Average time courses of TG-induced Ca<sup>2+</sup> responses in HaCaT cells cultured in 0.03 mM Ca<sup>2+</sup> (A) or 1.8 mM Ca<sup>2+</sup> (B)-containing KGM-2. Cells were treated with 5 μM SYNTA66 or 30 μM 2-APB 5 minutes prior to TG treatment in the absence of extracellular Ca<sup>2+</sup>. Right panels showed peak [Ca<sup>2+</sup>] rises attributable to Ca<sup>2+</sup> release and influx evoked by TG. Data are means ± s.e.m. from three independent experiments. (C) Average time courses of 10 mM extracellular Ca<sup>2+</sup>-induced Ca<sup>2+</sup> responses in HaCaT cells. Cells were treated with 5 μM SYNTA66 or 30 μM 2-APB 5 minutes before Ca<sup>2+</sup> switch (left). Peak [Ca<sup>2+</sup>] rises of Ca<sup>2+</sup>-switch-induced Ca<sup>2+</sup> responses (right). Data are means ± s.e.m. from three independent experiments. \*\*\**P*<0.001 (one way ANOVA followed by Tukey's test).

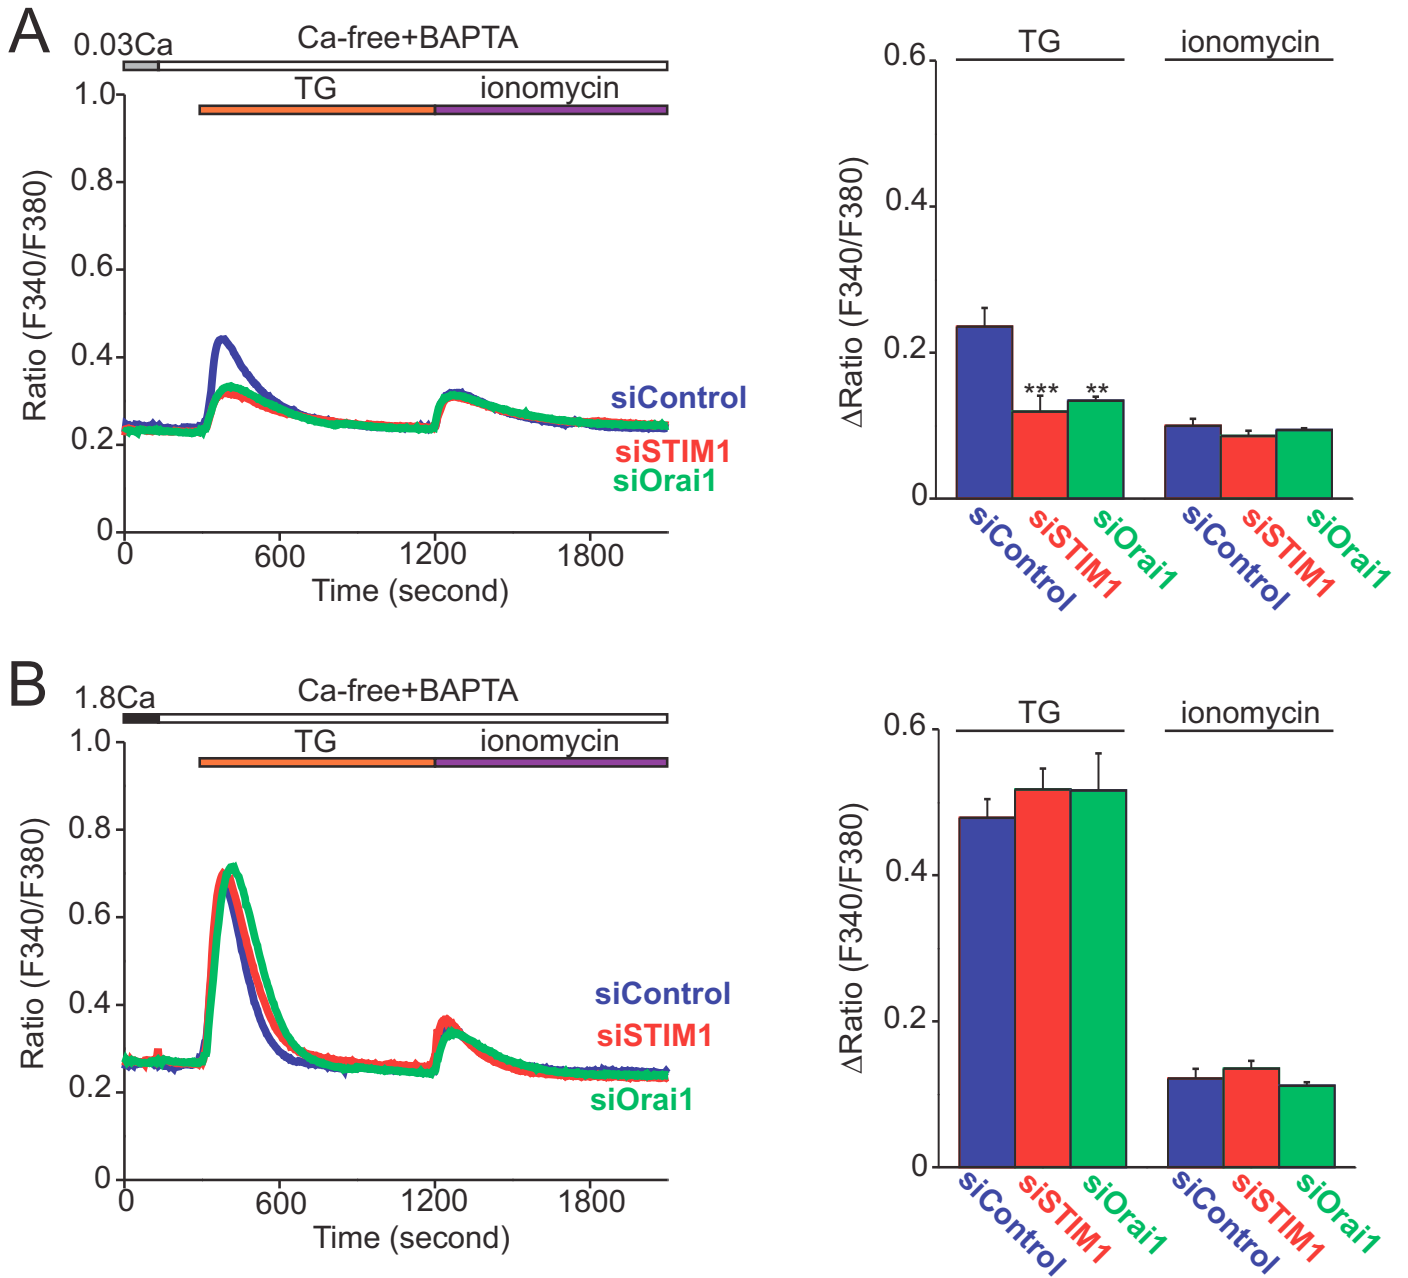

**Fig. S3. STIM1 and Orai1 knockdown only reduce TG-sensitive intracellular  $\text{Ca}^{2+}$  stores of ER in HaCaT cells cultured in 0.03 mM  $\text{Ca}^{2+}$ .** (A,B) Average time courses of  $\text{Ca}^{2+}$  release from ER and other intracellular  $\text{Ca}^{2+}$  stores by sequential treatment of 2  $\mu\text{M}$  TG and 20  $\mu\text{M}$  ionomycin in 3 mM BAPTA containing solution in siRNA-transfected HaCaT cells cultured in 0.03 mM (A) or 1.8 mM (B)  $\text{Ca}^{2+}$ -containing KGM-2. Right panels showed peak  $[\text{Ca}^{2+}]$  rises attributable to  $\text{Ca}^{2+}$  release evoked by TG or ionomycin. Data are means  $\pm$  s.e.m. from three independent experiments. \*\* $P < 0.01$ , \*\*\* $P < 0.001$  (one way ANOVA followed by Tukey's test).
